# Supplementary material for: Application of the cobaltabisdicarbollide anion to the development of ion selective PVC membrane electrodes for tuberculosis drug analysis
Source: Royal Society of Chemistry journal article supplement (doi:10.1039/b813285b), 2008-01-01
Supplement: b813285b.pdf [file b813285b.pdf]

Electronic Supplementary Information

# Application of the cobaltbisdicarbollide anion to the development of Ion Selective PVC membrane electrode for tuberculosis drug analysis

Anca-Iulia Stoica<sup>a,b</sup>, Clara Viñas<sup>a</sup> and Francesc Teixidor<sup>\*a</sup>

<sup>a</sup> Institut de Ciència de Materials de Barcelona  
CSIC Campus de la U.A.B., 08193 Bellaterra (Spain)  
Fax: (+34)935805729 E-mail: [teixidor@icmab.es](mailto:teixidor@icmab.es)

<sup>b</sup> On leave from the Department of Analytical Chemistry, Faculty of Chemistry, University of Bucharest

## Supporting Information

Experimental procedures, FTIR, NMR, MALDI-TOF values, tables concerning electrode characteristics (Table 1) and selectivity coefficients of electrode for various compounds (Table 2)

### Experimental Section

**Instrumentation:** IR spectra ( $\nu$ ,  $\text{cm}^{-1}$ ; KBr pellets) were obtained on a Shimadzu FTIR-8300 spectrophotometer. The  $^1\text{H}$ - and  $^1\text{H}\{^{11}\text{B}\}$ -NMR (300.13 MHz),  $^{13}\text{C}\{^1\text{H}\}$ -NMR (75.47 MHz),  $^{11}\text{B}$ - and  $^{11}\text{B}\{^1\text{H}\}$ -NMR (96.29 MHz) spectra were recorded on a Bruker ARX 300 instrument equipped with the appropriate decoupling accessories. All NMR spectra were performed in  $d_6$ -acetone at 22°C. The  $^{11}\text{B}$ - and  $^{11}\text{B}\{^1\text{H}\}$ -NMR shifts were referenced to external  $\text{BF}_3 \cdot \text{OEt}_2$ , while the  $^1\text{H}$ ,  $^1\text{H}\{^{11}\text{B}\}$ , and  $^{13}\text{C}\{^1\text{H}\}$ -NMR shifts were referenced to  $\text{SiMe}_4$ . Chemical shifts are reported in units of parts per million downfield from reference, and all coupling constants in Hz. The mass spectra were recorded in the negative ion mode using a Bruker Biflex MALDI-TOF-MS [ $\text{N}_2$  laser;  $\lambda_{\text{exc}}$  337 nm (0.5 ns pulses); voltage ion source 20.00 kV (Uis1) and 17.50 kV (Uis2)].

**Synthesis of H[H-PZA]<sub>2</sub>[cosane]<sub>3</sub>(3).** Firstly,  $\text{H}^+[\text{Co}(1,2\text{-C}_2\text{B}_9\text{H}_{11})_2]^-$  was obtained from  $\text{Cs}[\text{Co}(1,2\text{-C}_2\text{B}_9\text{H}_{11})_2]$  (0.3000 g) and HCl 1M (15 mL), extracting the resulted product in ether (20mL). The extraction procedure was made by 3 times (solution 1). Pyrazinamide (0.0123 g) was dissolved in 10 mL of HCl 3M under stirring (solution 2). Secondly, the ion-pair compound  $[\text{PZA}]^+[\text{cos}]^-$  was prepared by mixing 10 mL of 0.01M solution 1 with 10 mL of 0.01M solution 2 under stirring resulting a yellow precipitate. The precipitate was filtered, washed with a solution of HCl and dried in vacuum atmosphere.

FTIR: 3468, 3356 ( $\text{NH}_2$ ), 3117, 3094, 3078, 3040, 3028 ( $\text{C}_{\text{aryl}}\text{-H}$ ,  $\text{C}_c\text{-H}$ ); 2615, 2604, 2569, 2553, 2515 (B-H), 1709 (C=O), 1566, 1485, 1416 (N-C=O,  $\text{N}^+\text{-H}$ ).  $^1\text{H}$  NMR  $\delta$ : 10.04, 10.00, 9.93 (s, 6H,  $\text{C}_{\text{aryl}}\text{-H}$ ), 3.93 (s, 12H,  $\text{C}_c\text{-H}$ ), 3.70-0.50 (br m, B-H).  $^1\text{H}\{^{11}\text{B}\}$  NMR:  $\delta$ : 10.04, 10.00, 9.93 (s, 6H,  $\text{C}_{\text{aryl}}\text{-H}$ ), 3.93 (s, 12H,  $\text{C}_c\text{-H}$ ), 3.38 (br s, 6H, B-H), 2.97 (br s, 6H, B-H), 2.70 (br s, 12H, B-H), 1.93 (br s, 12H, B-H), 1.61 (br s, 6H, B-H), 1.56 (br s, 12H, B-H).  $^{13}\text{C}\{^1\text{H}\}$  NMR  $\delta$ : 153.14 (s,  $\text{C}_{\text{aryl}}$ ), 150.31 (s,  $\text{C}_{\text{aryl}}$ ), 147.51 (s,  $\text{C}_{\text{aryl}}$ ), 131.34 (s,  $\text{C}_{\text{aryl}}$ ), 51.00 (s,  $\text{C}_c$ ).  $^{11}\text{B}$ -NMR  $\delta$ : 7.3 (d,  $^1\text{J}(\text{B},\text{H})= 145$ , 2B), 2.1 (d,  $^1\text{J}(\text{B},\text{H})= 140$ , 2B), -4.9 (d,  $^1\text{J}(\text{B},\text{H})= 148$ , 2B); -5.3 (d,  $^1\text{J}(\text{B},\text{H})= 130$ , 8B), -16.6(d,  $^1\text{J}(\text{B},\text{H})= 154$ , 2B), -22.1 (d,  $^1\text{J}(\text{B},\text{H})= 167$ , 2B). MALDI-TOF (m/z): at the cathode, 154 (M +  $\text{CH}_2\text{O}$ ; 74.23%), 132.60 (M+  $\frac{1}{2}$   $\text{H}_2\text{O}$ ; 89.7%), 123.80 (M; 100%), 95.79 (M-  $\text{CO}_2$ , 83.50%). MALDI-TOF (m/z): at the anode 324.26 ( $[\text{Co}(1,2\text{-C}_2\text{B}_9\text{H}_{11})_2]$ , 100%).

**Synthesis of H[H<sub>2</sub>INH][cosane]<sub>3</sub>(3).** Firstly,  $\text{H}^+[\text{Co}(1,2\text{-C}_2\text{B}_9\text{H}_{11})_2]^-$  was obtained from  $\text{Cs}[\text{Co}(1,2\text{-C}_2\text{B}_9\text{H}_{11})_2]$  (0.3000 g) and HCl 1M (15 mL), extracting the resulted product

in ether (20mL). The extraction procedure was made by 3 times (solution 1). Isoniazid (0.0069g) was dissolved in 0.5 mL of HCl 1M under stirring and diluted with 4.5mL distilled water (solution 2). Secondly, the ion-pair compound  $[\text{INH}]^+[\text{cos}]^-$  was prepared by mixing 10 mL of 0.01M solution 1 with 5 mL of 0.01M solution 2 under stirring resulting a yellow precipitate. The precipitate was filtered, washed with a diluted solution of HCl and dried in vacuum atmosphere.

FTIR: 3626-3418 ( $\text{NH}_2$ ), 3097, 3036 ( $\text{C}_{\text{aryl}}\text{-H}$ ,  $\text{C}_c\text{-H}$ ); 2549, 2523 (B-H), 1701 ( $\text{C}=\text{O}$ ), 1604, 1496 ( $\text{N}-\text{C}=\text{O}$ ,  $\text{N}^+\text{-H}$ ).  $^1\text{H}$  NMR ( $\text{CDCl}_3$ )  $\delta$ : 9.41 (d,  $^3\text{J}(\text{H,H})= 5.8$ , 2H,  $\text{C}_{\text{aryl}}\text{-H}$ ), 8.75 (d,  $^3\text{J}(\text{H,H})= 5.8$ , 2H,  $\text{C}_{\text{aryl}}\text{-H}$ ), 3.94 (s, 12H,  $\text{C}_c\text{-H}$ ), 3.5-0.5 (br m, B-H).  $^1\text{H}\{^{11}\text{B}\}$  NMR ( $\text{CDCl}_3$ ):  $\delta$ : 9.41 (d,  $^3\text{J}(\text{H,H})= 5.8$ , 2H,  $\text{C}_{\text{aryl}}\text{-H}$ ), 8.75 (d,  $^3\text{J}(\text{H,H})= 5.8$ , 2H,  $\text{C}_{\text{aryl}}\text{-H}$ ), 3.94 (s, 12H,  $\text{C}_c\text{-H}$ ), 3.37 (br s, 6H, B-H), 2.97 (br s, 6H, B-H), 2.70 (br s, 12H, B-H), 1.92 (s, 12H, B-H), 1.61 (br s, 6H, B-H), 1.56 (br s, 12H, B-H).  $^{13}\text{C}\{^1\text{H}\}$  NMR  $\delta$ : 163.1 (s,  $\text{C}=\text{O}$ ), 146.4 (s,  $\text{C}_{\text{aryl}}$ ), 143.5 (s,  $\text{C}_{\text{aryl}}$ ), 143.0 (s,  $\text{C}_{\text{aryl}}$ ), 127.3 (s,  $\text{C}_{\text{aryl}}$ ), 126.5 (s,  $\text{C}_{\text{aryl}}$ ), 51.06 (s,  $\text{C}_c$ ).  $^{11}\text{B}$ -NMR  $\delta$ : 7.3 (d,  $^1\text{J}(\text{B,H})= 142$ , 2B), 2.1 (d,  $^1\text{J}(\text{B,H})= 140$ , 2B), -4.7 (d,  $^1\text{J}(\text{B,H})= 135$ , 2B), -5.7 (d,  $^1\text{J}(\text{B,H})= 153$ , 8B), -16.6 (d,  $^1\text{J}(\text{B,H})= 140$ , 2B), -22.04 (d,  $^1\text{J}(\text{B,H})= 140$ , 2B). MALDI-TOF (m/z): at the cathode 198.85 (M + $\text{CON}_2\text{H}_5$ ; 56%), 149.80 (M+12; 100%), 132.63 (M-5; 87%). MALDI-TOF (m/z): at the anode 324.25 ( $[\text{Co}(1,2\text{-C}_2\text{B}_9\text{H}_{11})_2]$ , 100%).

**Table 1.** Electrode characteristics

| Antibiotic                 | INH                                              | PZA                                              | INH                                              | PZA                                              | INH                                              | PZA                                              |
|----------------------------|--------------------------------------------------|--------------------------------------------------|--------------------------------------------------|--------------------------------------------------|--------------------------------------------------|--------------------------------------------------|
| Plasticizer                | NPOE                                             | NPOE                                             | DOP                                              | DOP                                              | DBP                                              | DBP                                              |
| Slope<br>mV/decade         | 52.37                                            | 56.98                                            | 47.80                                            | 46.70                                            | 44.10                                            | 46.64                                            |
| Correlation<br>coefficient | 0.9973                                           | 0.9971                                           | 0.9989                                           | 0.9975                                           | 0.9991                                           | 0.9988                                           |
| Concentration<br>range (M) | 1.00·10 <sup>-4</sup> -<br>1.00·10 <sup>-1</sup> | 5.00·10 <sup>-4</sup> -<br>1.00·10 <sup>-1</sup> | 1.00·10 <sup>-1</sup> -<br>1.00·10 <sup>-4</sup> | 5.00·10 <sup>-5</sup> -<br>1.00·10 <sup>-1</sup> | 1.00·10 <sup>-4</sup> -<br>1.00·10 <sup>-1</sup> | 5.00·10 <sup>-5</sup> -<br>1.00·10 <sup>-1</sup> |
| Detection<br>limit (M)     | 5.00 ·10 <sup>-5</sup>                           | 3.00 ·10 <sup>-5</sup>                           | 5.80 ·10 <sup>-5</sup>                           | 1.00·10 <sup>-5</sup>                            | 7.00 ·10 <sup>-5</sup>                           | 2.00·10 <sup>-5</sup>                            |
| Time<br>response/s         | <5                                               | < 5                                              | <5                                               | < 5                                              | <5                                               | < 5                                              |
| Lifetime/<br>day           | > 45                                             | > 45                                             | > 45                                             | > 45                                             | > 45                                             | > 45                                             |
| pH                         | 1.85-9.50                                        | 2.20-9.50                                        | 1.85-9.50                                        | 2.20-9.50                                        | 1.85-9.50                                        | 2.20-9.50                                        |

**Table 2** Selectivity coefficients of electrode for various compounds

| Interfering<br>species | lgK <sup>pot</sup> <sub>INH/B</sub> | lgK <sup>pot</sup> <sub>PZA/B</sub> | lgK <sup>pot</sup> <sub>INH/B</sub> | lgK <sup>pot</sup> <sub>PZA/B</sub> | lgK <sup>pot</sup> <sub>INH/B</sub> | lgK <sup>pot</sup> <sub>PZA/B</sub> |
|------------------------|-------------------------------------|-------------------------------------|-------------------------------------|-------------------------------------|-------------------------------------|-------------------------------------|
|                        | NPOE                                | NPOE                                | DOP                                 | DOP                                 | DBP                                 | DBP                                 |
| Na <sup>+</sup>        | -1.54                               | -3.36                               | -1.88                               | -5.19                               | -1.86                               | -4.36                               |
| K <sup>+</sup>         | -2.57                               | -5.32                               | 4.82                                | -6.39                               | -3.31                               | < -7                                |
| Ca <sup>2+</sup>       | -4.28                               | -6.34                               | -5.20                               | < -7                                | -5.19                               | < -7                                |
| Mg <sup>2+</sup>       | -4.47                               | -4.32                               | -4.98                               | < -7                                | 4.90                                | < -7                                |
| INH                    | -                                   | < -7                                | -                                   | < -7                                | -                                   | < -7                                |
| PZA                    | -2.87                               | -                                   | -3.82                               | -                                   | -2.88                               | -                                   |
| sulfanilamide          | -2.08                               | -6.02                               | -4.07                               | < -7                                | -4.02                               | < -7                                |
